# Supplementary material
Source: publisher figshare collection journal article supplement (https://frontiersin.figshare.com/ndownloader/files/30744172)
Supplement: Supplementary file 1 [file 30744172]

**Supplementary Table S2**

|  | DRUV (microstrain) | DEGI (microstrain) | DMSC (microstrain) |
| --- | --- | --- | --- |
| Observed Intrusion | +0.21 | +0.85 | +0.36 |
| Modeled Intrusion | +0.20 | +0.26 | +0.14 |
| Observed Fountain | -0.22 | -1.0 | -0.12 |
| Modeled Fountain | -0.24 | -0.18 | -0.16 |

**Table S2.** Observed and computed strain variations at the three dilatometer stations during the magmatic intrusion on the 19th December and the lava fountaining events.
